# Supplementary material
Source: publisher figshare collection journal article supplement (https://asha.figshare.com/articles/dataset/_/25579905)
Supplement: Supplementary file 2 [file 1]

**Supplemental Material S1.** Description of toys available during dyadic caregiver–child interactions.

*Photo of Wooden Puzzle*

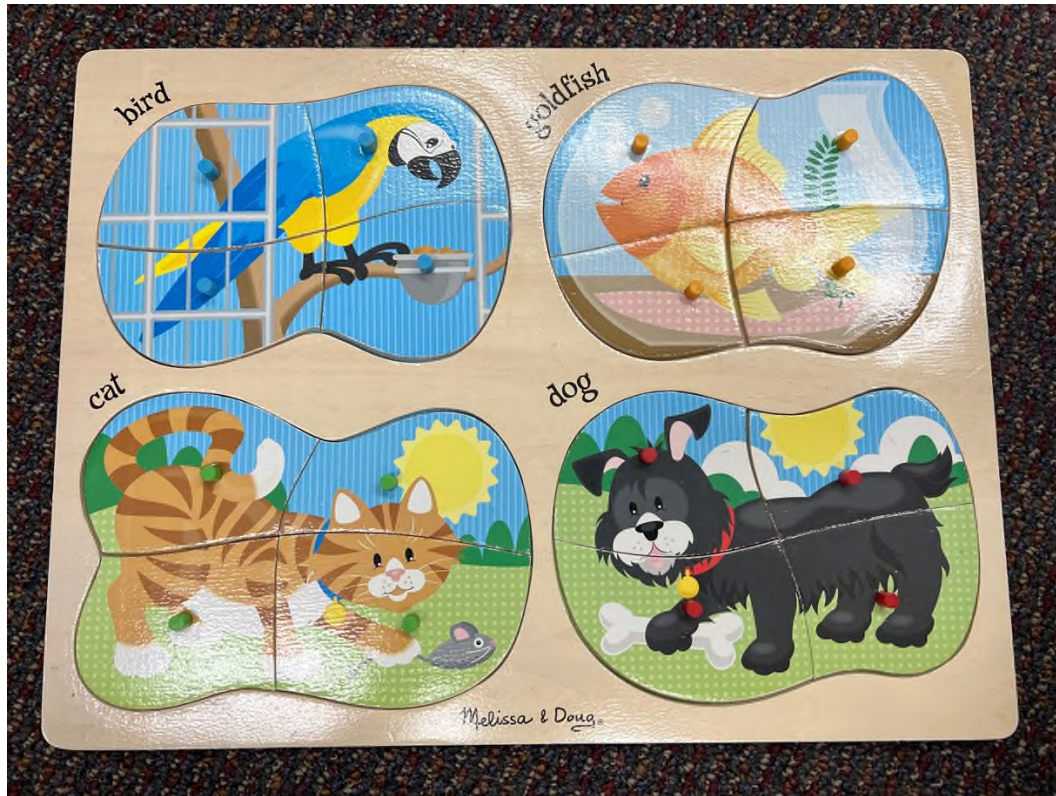

*Note.* The wooden puzzle was a Melissa & Doug 16-piece puzzle of a bird, goldfish, cat, and dog.

*Photo of Barn Set*

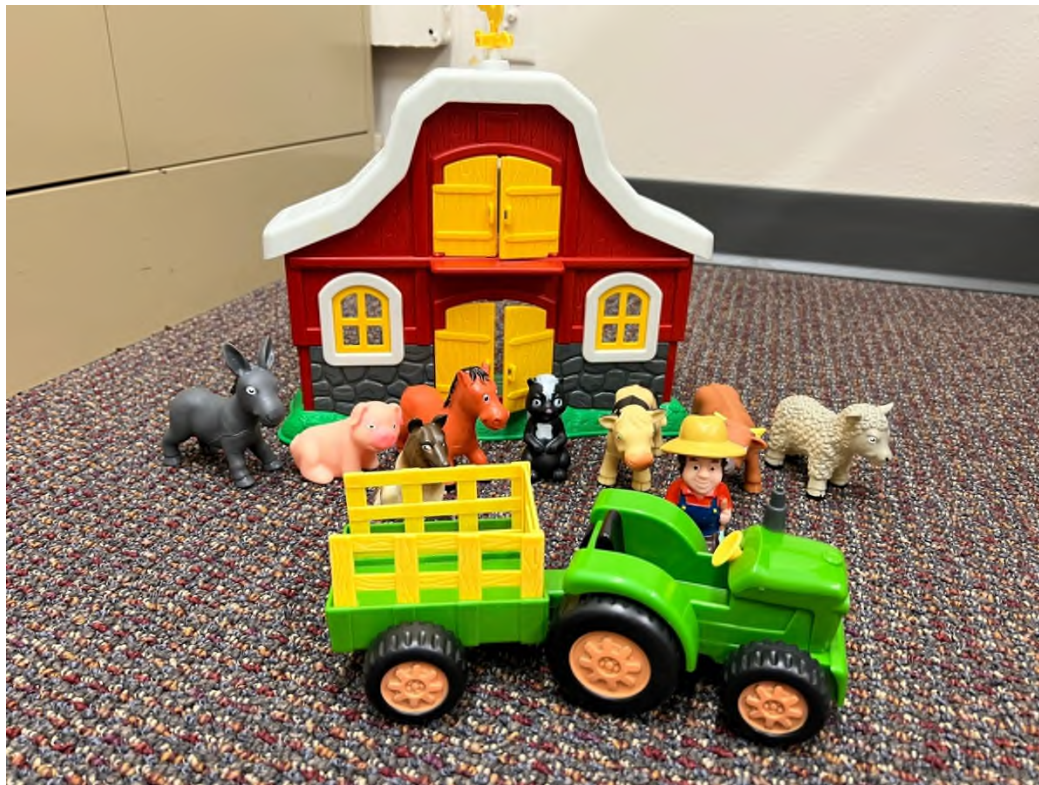

*Note.* The barn set included a red plastic barn, a green tractor, a farmer, and nine animals: donkey, pig, horse, skunk, dog, cat, cow, bull, and sheep.



*Photo of Dinosaur Set*

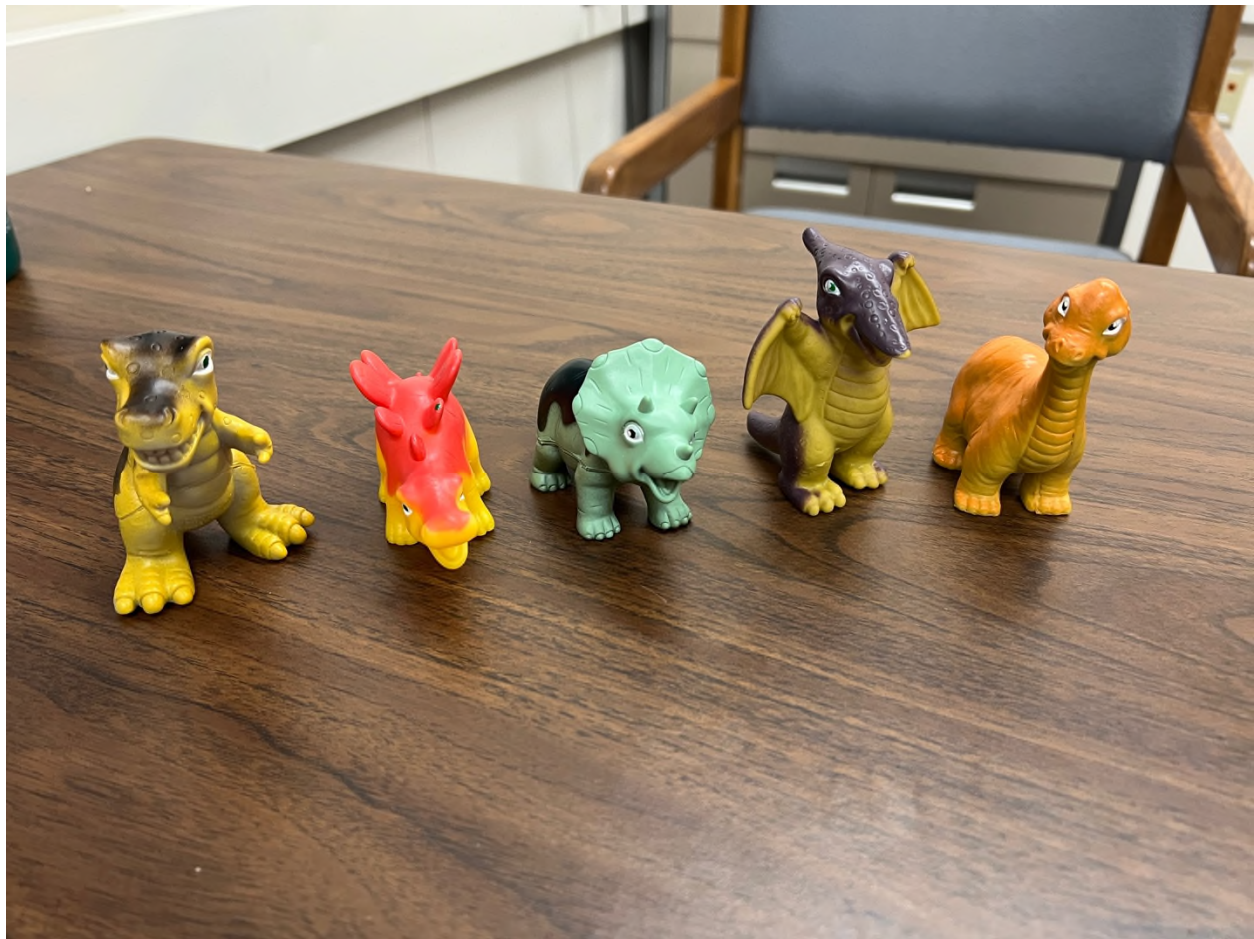

*Note.* The dinosaur set included five plastic dinosaurs: tyrannosaurus rex, stegosaurus, triceratops, pterodactyl, and brachiosaurus.

*Photo of Large LEGO set*

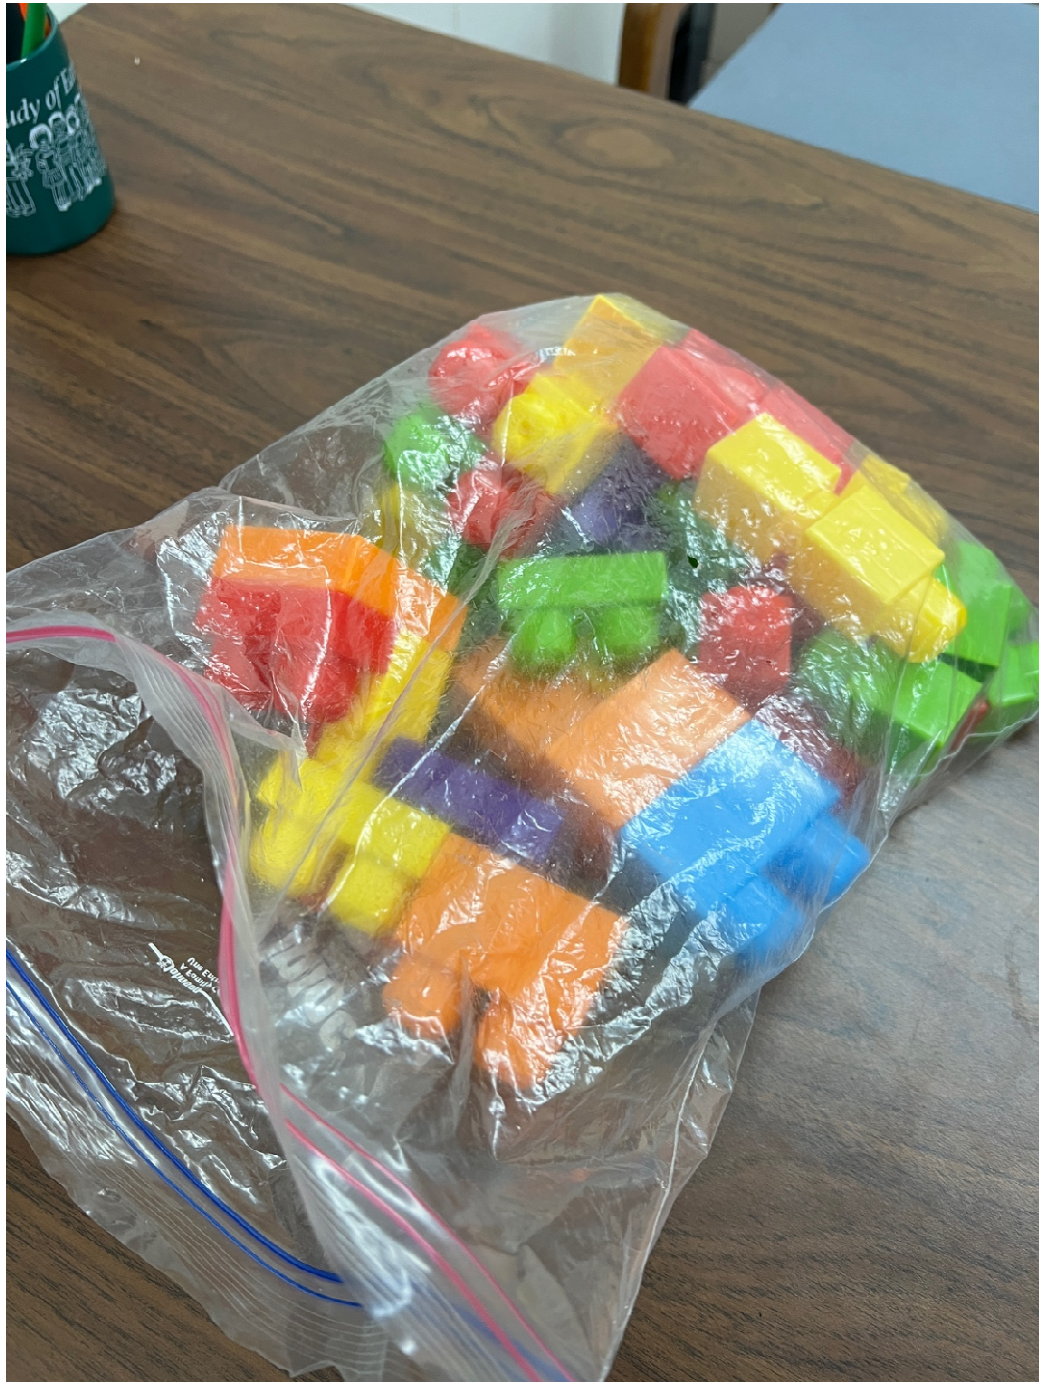

*Note.* The LEGO set included 2x24 multicolored LEGO blocks.



*Photo of Doctor Set with Baby*

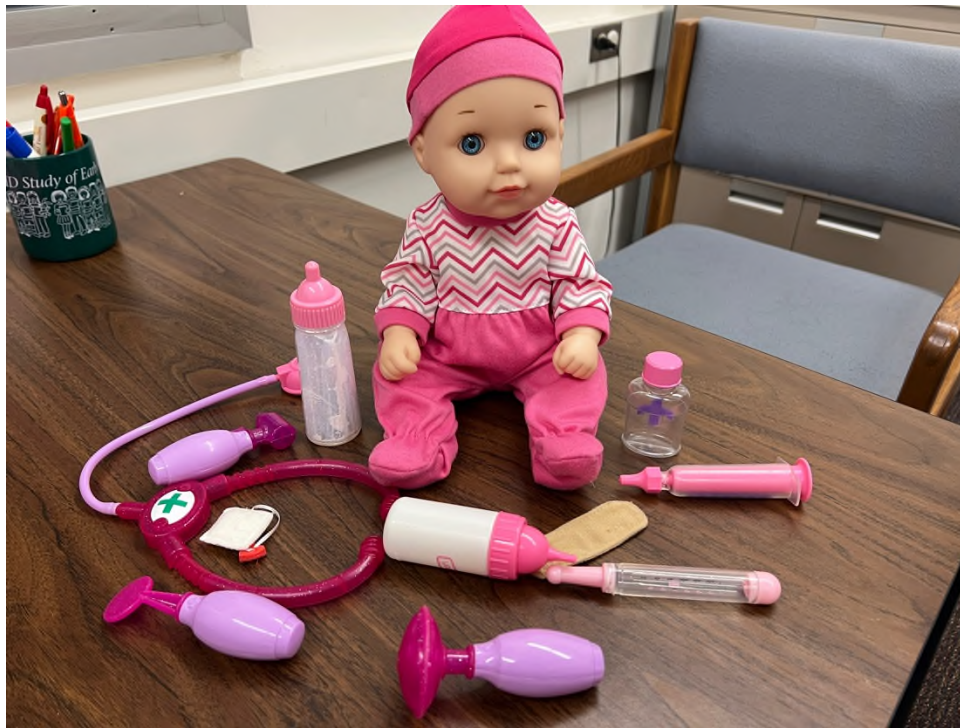

*Note.* The doctor set included a baby doll with a pink outfit and a bottle with the following nine doctor toys: thermometer, syringe, Band-Aid, ointment jar, otoscope, mirror, stethoscope, knee reflex hammer, and a bottle.

*Photo of Tea Party Set*

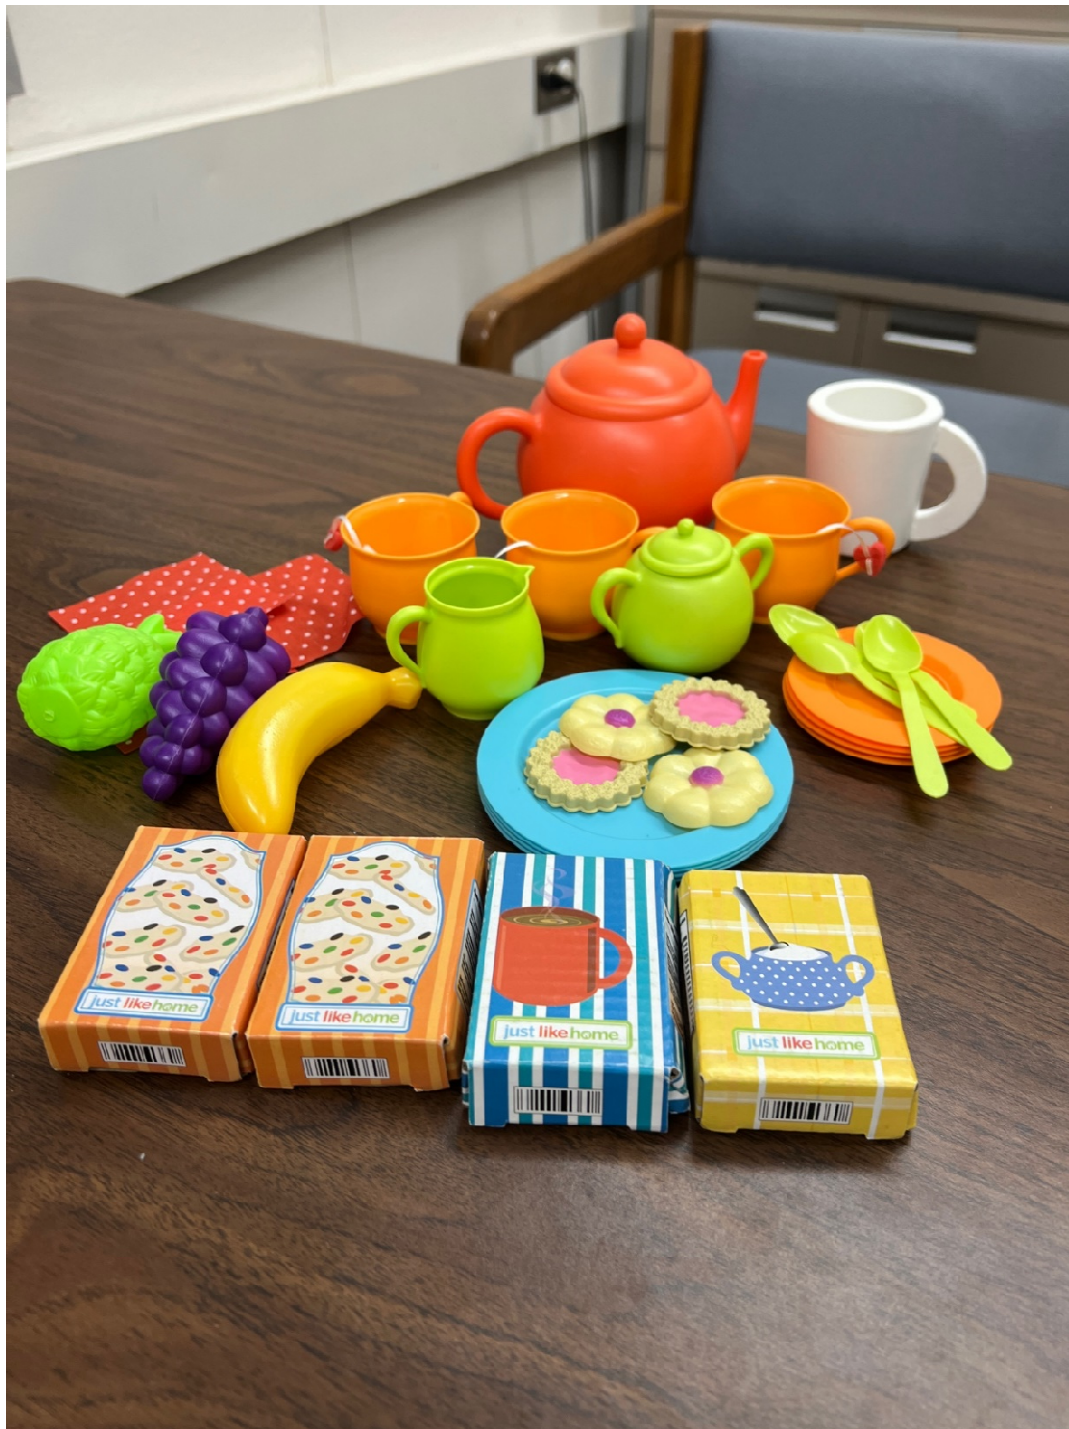

*Note.* The tea party set included the following: teapot, 1 mug, 3 teacups, 4 teabags, creamer jar, sugar jar, 4 spoons, 4 large plates, 4 small plates, 4 cookies, 4 napkins, pineapple, grapes,

banana, 2 cardboard boxes for cookies, 1 cardboard box for hot cocoa mix, and 1 cardboard box for sugar cubes.
